# Supplementary material for: Exploring the electrochemical characteristics of the nucleobase-template assisted NiCo2O4 electrode for supercapacitors
Source: Royal Society of Chemistry journal article supplement (doi:10.1039/d2nj05436a), 2023-01-01
Supplement: d2nj05436a2.pdf [file d2nj05436a2.pdf]

*Electronic Supplementary Material (ESI) for New Journal of Chemistry*

## Exploring the Electrochemical Characteristics of the Nucleobase-Template

### Assisted NiCo<sub>2</sub>O<sub>4</sub> Electrode Materials for Supercapacitors

Karthik Krishnan,<sup>a\*</sup> Amuthan Dekshinamoorthy,<sup>a</sup> Saranyan Vijayaraghavan,<sup>a</sup> and Selvakumar Karuthapandi,<sup>b\*</sup>

<sup>a</sup>Corrosion and Material Protection Division, CSIR-Central Electrochemical Research Institute, Karaikudi, Tamil Nadu-630003, India.

<sup>b</sup>Department of Chemistry, School of Advanced Sciences, VIT-AP University, Amaravati, Andhra Pradesh 522237, India.

\*Corresponding author email: [selvakumar.k@vitap.ac.in](mailto:selvakumar.k@vitap.ac.in); [karthikk@cecri.res.in](mailto:karthikk@cecri.res.in)

| S. No. | Content                                                                                                                     | Page No. |
|--------|-----------------------------------------------------------------------------------------------------------------------------|----------|
| 1.     | Nitrogen adsorption-desorption isotherms measured at 77 K for the the prepared NCO nanostructures                           | 2        |
| 2.     | Typical cyclic voltammetry (CV) curves of the prepared NCO nanostructures using different combinations of nucleic acids     | 3        |
| 3.     | Galvanostatic charge–discharge (GCD) plots of the prepared NCO nanostructures using different combinations of nucleic acids | 4        |
| 4.     | Capacitance retention characteristics of NCO/A-G nanostructures in a three-electrode configuration                          | 5        |
| 5.     | Comparison table of various electrochemical characteristics of NCO-based supercapacitors with the previously reported works | 6        |
| 6.     | Nyquist plots of the prepared NCO nanostructures using various combinations of nucleic acids                                | 7        |
| 7.     | The obtained electrical parameters of NCO-based supercapacitor devices is tabulated from the EIS analysis                   | 8        |
| 8.     | Bode's plots estimated from Millers approach using the EIS curves                                                           | 8        |
| 9.     | Nyquist plots of NCO/A-G based ASC device measured before and after all the electrochemical studies                         | 9        |
| 10.    | References                                                                                                                  | 10       |

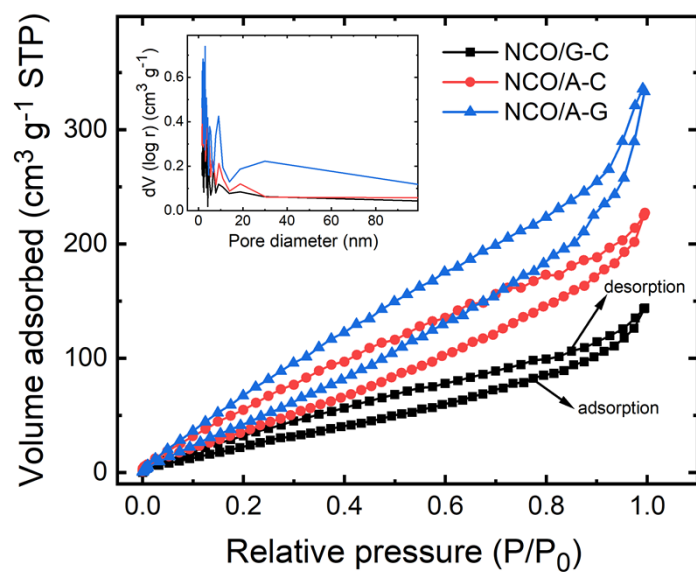

**Figure S1.** Nitrogen adsorption-desorption isotherms measured at 77 K for the NCO/G-C, NCO/A-C, and NCO/A-G nanostructures. The inset shows the corresponding Barrett–Joyner–Halenda (BJH) pore size distributions.

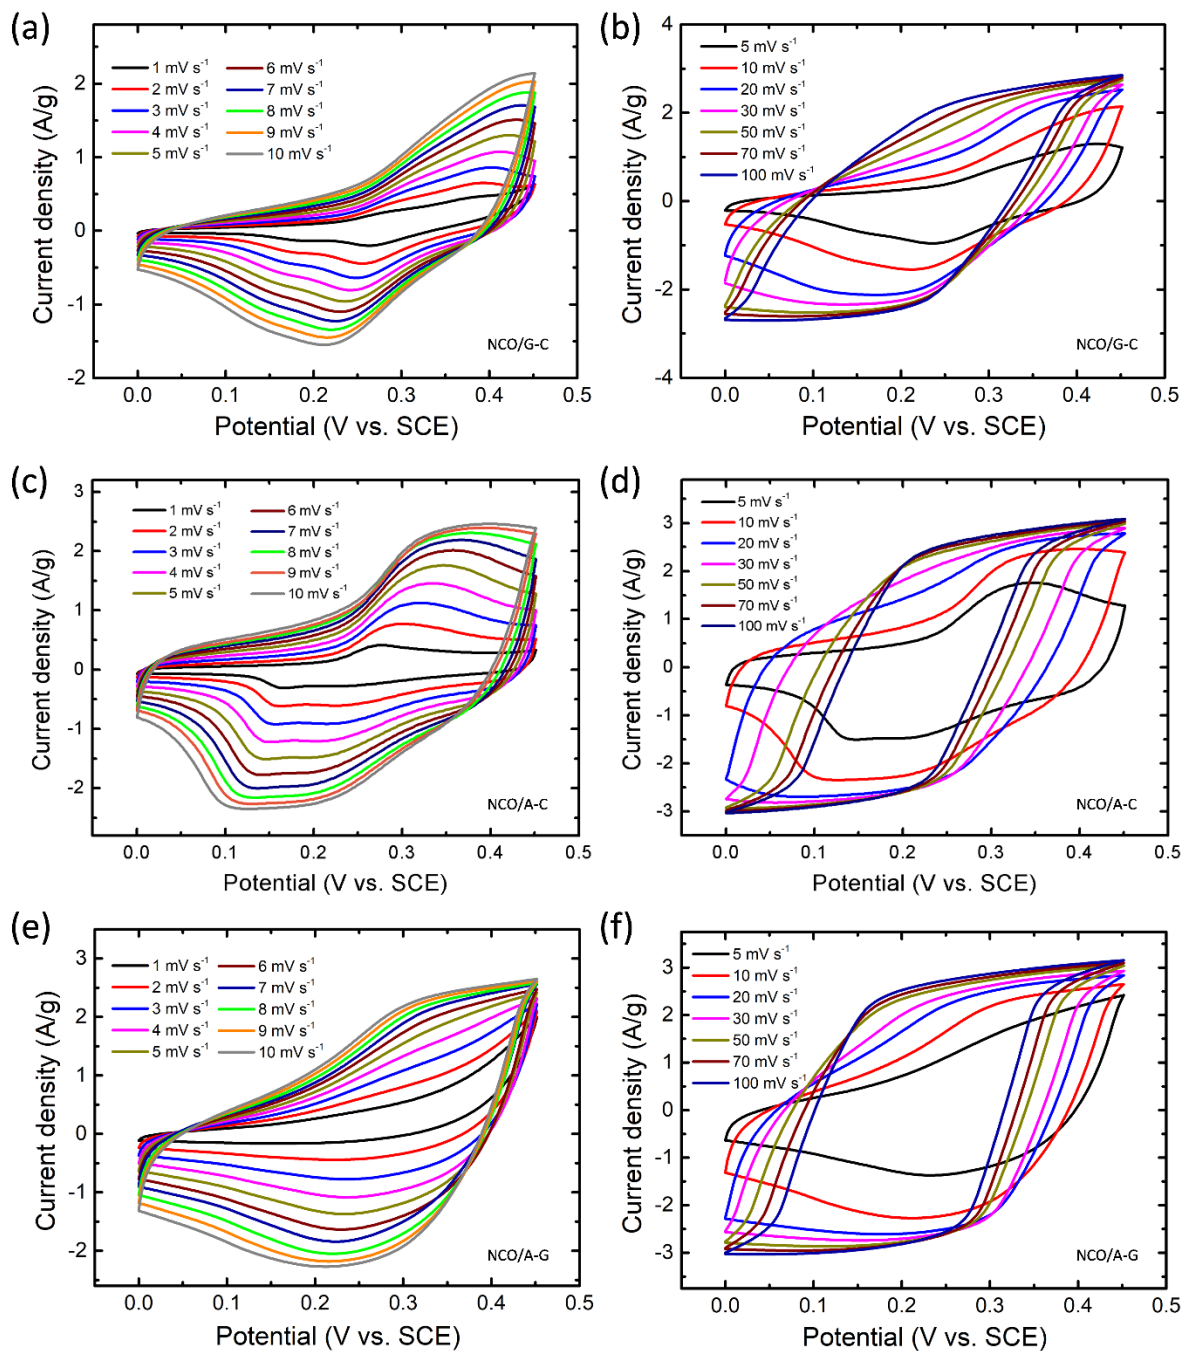

**Figure S2.** Typical cyclic voltammetry (CV) curves of the prepared NCO nanostructures using different combinations of nucleic acids such as (a, b) guanine (G)-cytosine (C), (c, d) adenine (A)-cytosine (C), and (e, f) adenine (A)-guanine (G), measured under various scan rates (1  $\text{mV s}^{-1}$  to 100  $\text{mV s}^{-1}$ ) and a potential window of 0–4.5 V.

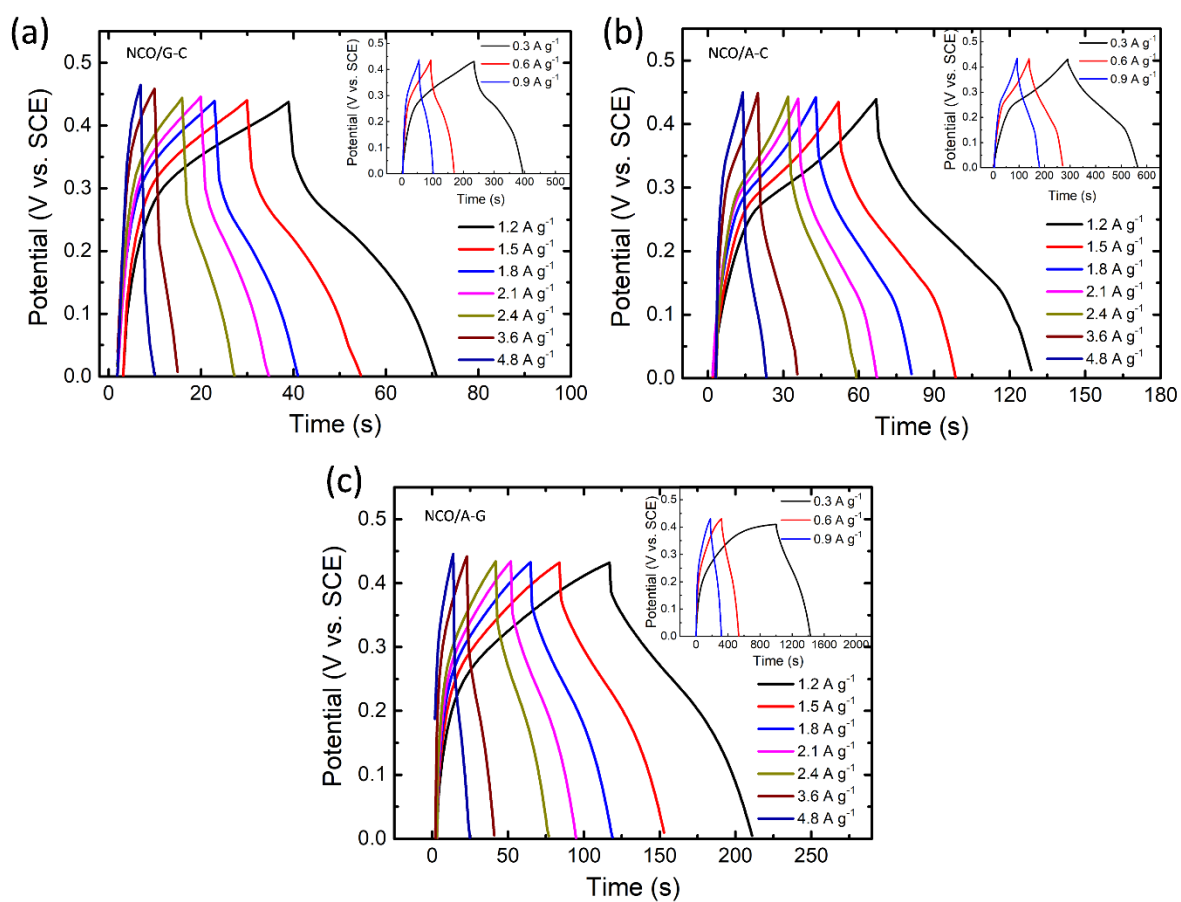

**Figure S3.** Typical galvanostatic charge–discharge (GCD) plots of the prepared NCO nanostructures using various combinations of nucleic acids such as (a) G-C (b) A-C and (c) A-G, measured under different current densities. The insets represent the lower current density ranges.

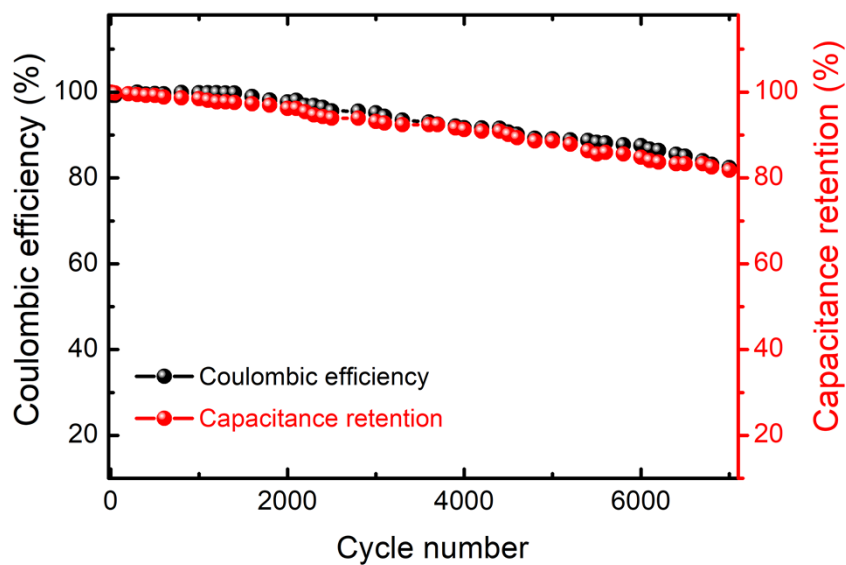

**Figure S4.** Capacitance retention characteristics of NCO/A-G nanostructures measured under 7000 continuous charge–discharge cycles at a constant current density of  $3.6 \text{ A g}^{-1}$  in a three-electrode configuration.

**Table S1.** Comparison of various electrochemical characteristics of NCO-based supercapacitor devices with the previously reported works.

| <b>Electrode Materials</b>                              | <b>Electrolyte</b> | <b>Test condition</b> | <b>Specific capacity</b>                | <b>Ref.</b> |
|---------------------------------------------------------|--------------------|-----------------------|-----------------------------------------|-------------|
| NiCo <sub>2</sub> O <sub>4</sub> nanoagglomerates       | 1M KOH             | 0.5 A g <sup>-1</sup> | 95.6 mA h g <sup>-1</sup> (3-electrode) | [1]         |
| honeycomb-structured NiCo <sub>2</sub> O <sub>4</sub>   | 2M KOH             | 0.5 A g <sup>-1</sup> | 140.1 mA h g <sup>-1</sup>              | [2]         |
| 3D rGO-PPy aerogels                                     | 2M KOH             | 0.5 A g <sup>-1</sup> | 72.2 mA h g <sup>-1</sup>               | [2]         |
| NiCo <sub>2</sub> O <sub>4</sub> /Superactivated Carbon | 2M KOH             | 1 A g <sup>-1</sup>   | 24.6 mA h g <sup>-1</sup>               | [3]         |
| Porous NiCo <sub>2</sub> O <sub>4</sub> nanoplates      | 1M KOH             | 1 A g <sup>-1</sup>   | 147 mA h g <sup>-1</sup>                | [4]         |
| NiCo <sub>2</sub> O <sub>4</sub> nanosheets             | 2M KOH             | 1 A g <sup>-1</sup>   | 122.5 mA h g <sup>-1</sup>              | [5]         |
| NiCo <sub>2</sub> O <sub>4</sub> crystals               | 1M KOH             | 0.5 A g <sup>-1</sup> | 95.6 mA h g <sup>-1</sup>               | [6]         |
| NCO/A-G (adenine-guanine)                               | 3M KOH             | 0.3 A g <sup>-1</sup> | 130 mA h g <sup>-1</sup>                | This work   |

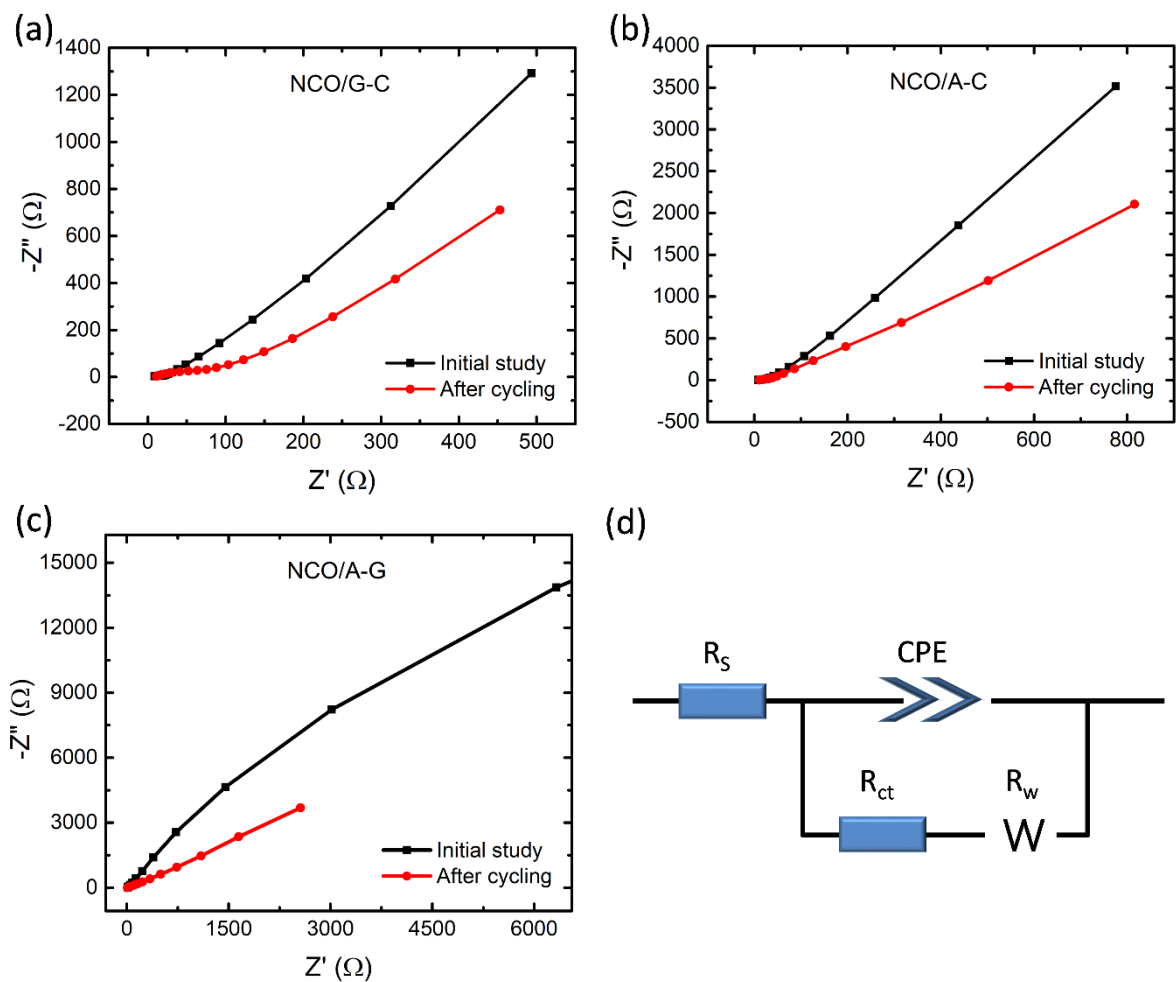

**Figure S5.** Nyquist plots of the prepared NCO nanostructures using various combinations of nucleic acids such as (a) G-C (b) A-C and (c) A-G, measured initially and after all the electrochemical characteristics. (d) The corresponding equivalent circuit model for the NCO-based supercapacitor device.

**Table S2.** The obtained electrical parameters of NCO-based supercapacitor devices from the EIS analysis

| Devices | $R_b$<br>( $\Omega \text{ cm}^{-2}$ ) | $R_{ct}$<br>( $\Omega \text{ cm}^{-2}$ ) | $R$<br>( $\Omega \text{ cm}^{-2}$ ) | Response at $\phi = 45^\circ$ |                  |
|---------|---------------------------------------|------------------------------------------|-------------------------------------|-------------------------------|------------------|
|         |                                       |                                          |                                     | Frequency<br>(Hz)             | Time<br>(s)      |
| NCO/G-C | 18.9                                  | 51.8                                     | 89.1                                | 11.22                         | $\tau_0 = 0.089$ |
| NCO/A-C | 15.6                                  | 28.8                                     | 33.9                                | 28.78                         | $\tau_0 = 0.034$ |
| NCO/A-G | 12.3                                  | 10.1                                     | 22.1                                | 122.86                        | $\tau_0 = 0.008$ |

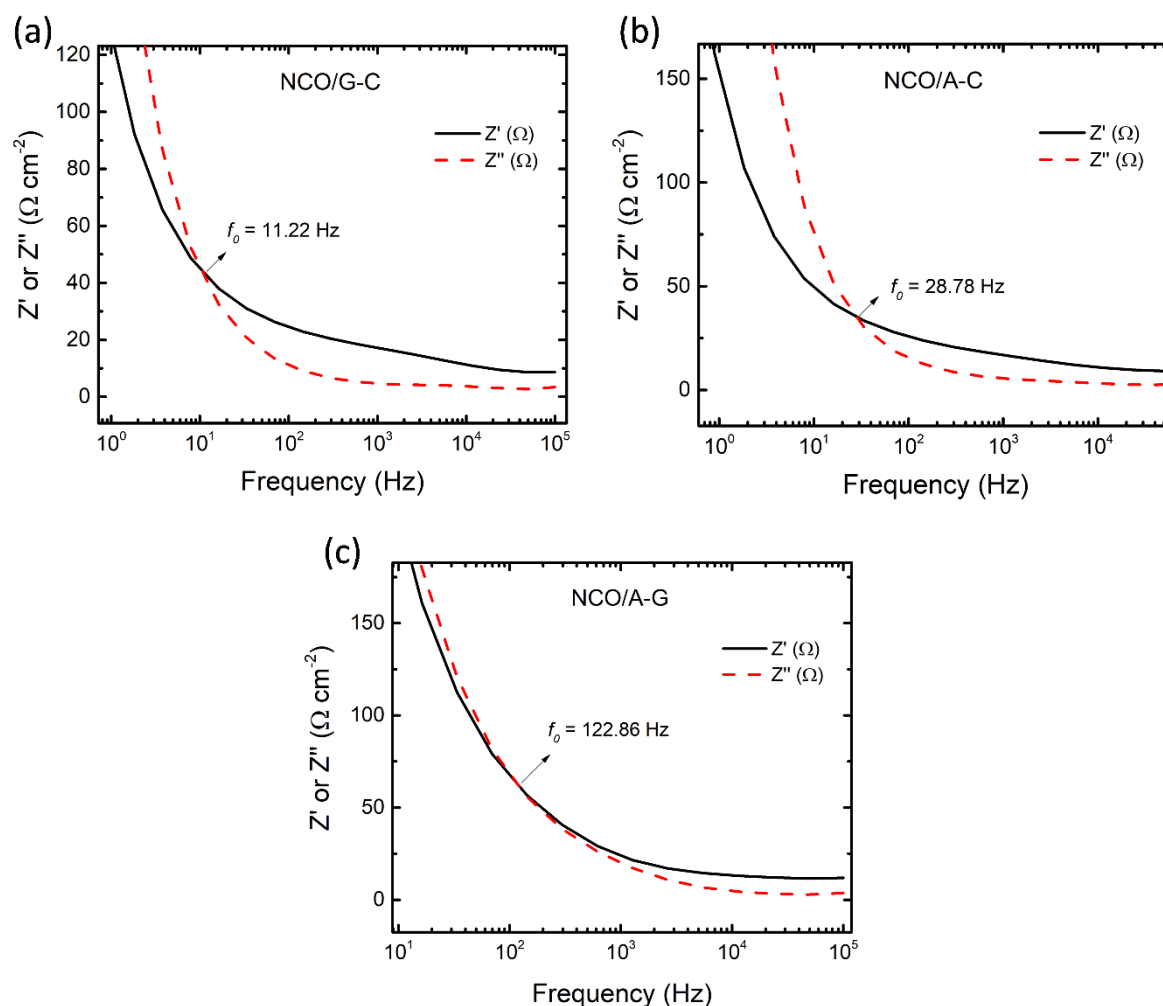

**Figure S6** Bode's plots estimated from Millers approach using the EIS curves of (a) NCO/G-C, (b) NCO/A-C, and (c) NCO/A-G devices, respectively.



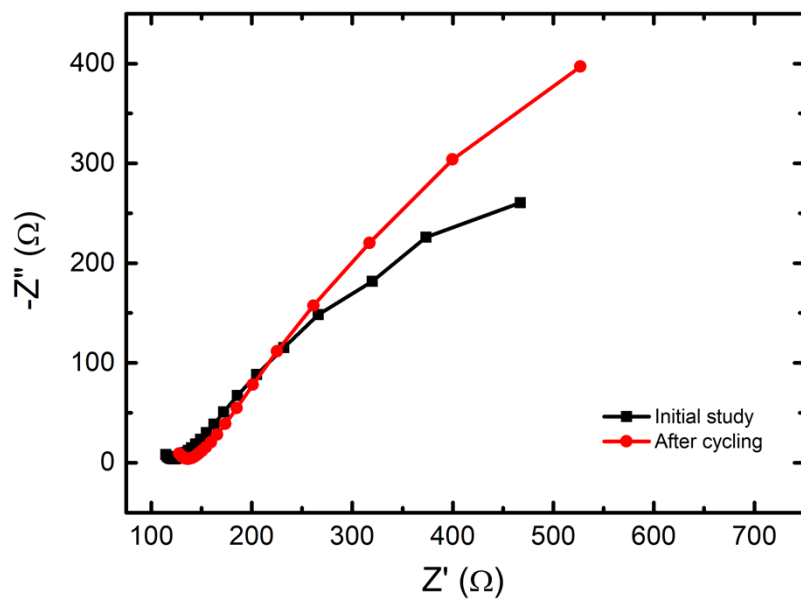

**Figure S7.** Nyquist plots of NCO/A-G based ASC device measured before and after all the electrochemical studies.

The GCD profiles of the six-serially assembled NCO/A-G-based ASC devices effectively light up a blue LED during discharging can be seen in the real-time movies **NCO-A-G ASC.mp4**.

## References

1. K. O. Oyedotun, A. A. Mirghni, O. Fasakin, D. J. Tarimo, V. N. Kitenge, and N. Manyala, High-energy asymmetric supercapacitor based on the nickel cobalt oxide ( $\text{NiCo}_2\text{O}_4$ ) nanostructure material and activated carbon derived from cocoa pods, *Energy & Fuels* 35, no. 24 (2021): 20309-20319.
2. C. Lai, X. Qu, H. Zhao, S. W. Hong, and K. Lee, Improved performance in asymmetric supercapacitors utilized by dual ion-buffering reservoirs based on honeycomb-structured  $\text{NiCo}_2\text{O}_4$  and 3D rGO-PPy aerogels, *Applied Surface Science*, 586 (2022), 152847.
3. T. Panja, N. Díez, R. Mysyk, D. Bhattacharjya, E. Goikolea, and D. Carriazo, Robust  $\text{NiCo}_2\text{O}_4$ /Superactivated Carbon Aqueous Supercapacitor with High Power Density and Stable Cyclability, *ChemElectroChem*, 6 (9), (2019), 2536-2545.
4. J. Pu, J. Wang, X. Jin, F. Cui, E. Sheng, and Z. Wang, Porous hexagonal  $\text{NiCo}_2\text{O}_4$  nanoplates as electrode materials for supercapacitor, *Electrochimica Acta* 106 (2013) 226-234.
5. H. Du, J. Lei, K. Xiang, W. Lin, J. Zheng, H. Liao, Facile synthesis of  $\text{NiCo}_2\text{O}_4$  nanosheets with oxygen vacancies for aqueous zinc-ion supercapacitors, *J. Alloys Comp.* 896, (2022), 162925.
6. Y. Q. Wu, X. Y. Chen, P. T. Ji, and Q. Q. Zhou. "Sol-gel approach for controllable synthesis and electrochemical properties of  $\text{NiCo}_2\text{O}_4$  crystals as electrode materials for application in supercapacitors." *Electrochimica Acta* 56, no. 22 (2011) 7517-7522.
